# Supplementary material for: Immunoglobulin A as a key immunological molecular signature of post-COVID-19 conditions
Source: bioRxiv or medRxiv preprint supplement (doi:10.1101/2023.05.11.23289866), 2023-05-16
Supplement: Supplementary file [file media-1.pdf]

Supplementary Materials for  
**Immunoglobulin A as a key immunological molecular signature of post-  
COVID-19 conditions**

Graziele Fonseca de Sousa *et al.*

\*Corresponding author. Email: [cintiabarros@macae.ufrj.br](mailto:cintiabarros@macae.ufrj.br) [cintiabarrosmacae@gmail.com](mailto:cintiabarrosmacae@gmail.com)

**This PDF file includes:**

Figs. S1 to S4

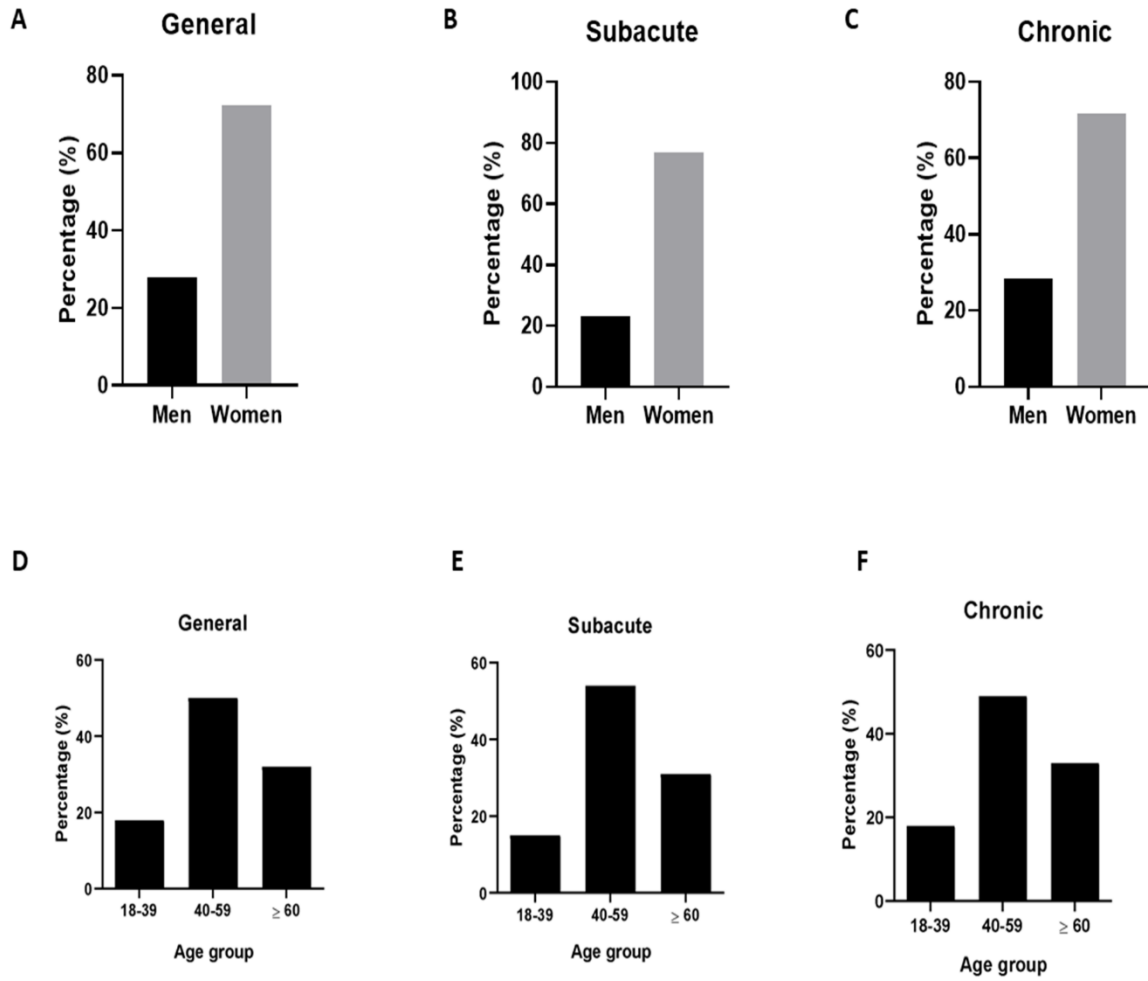

**Fig. S1. General data of the patients of the Centro de Acolhimento e Reabilitação Pós-COVID-19 (CARP).** Percentage of men and women who sought medical assistance at CARP (A), divided into subacute (B) and chronic (C) phases. Percentage of age groups that sought medical assistance at CARP (D), divided into subacute (E) and chronic (F) phases.

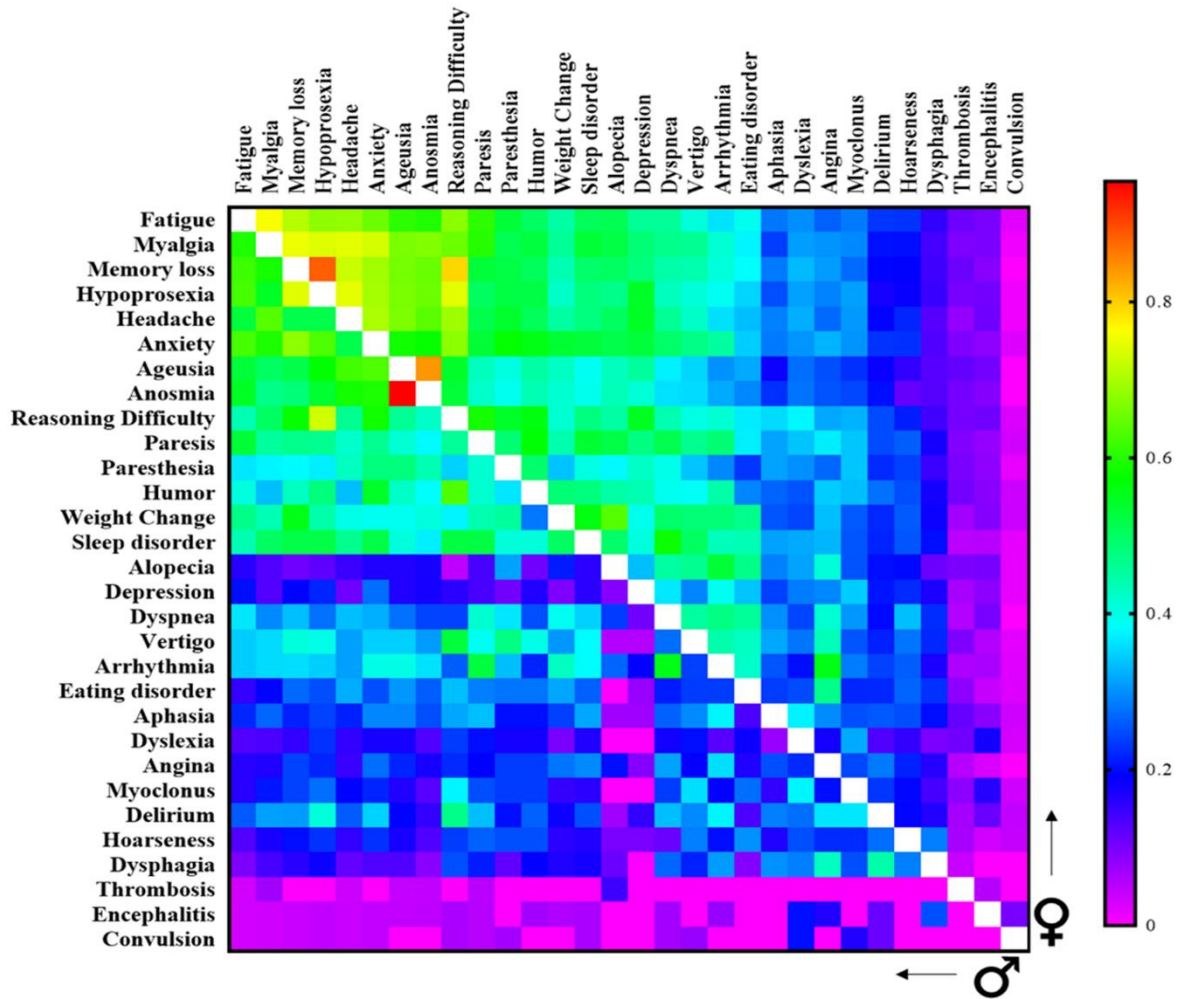

**Fig. S2.** Heatmap showing co-occurrence levels (Jaccard similarity index) between pairs of post-COVID-19 condition symptoms in men and women. The Jaccard index was measured based on the presence/absence of symptoms for each patient. Men are represented by the symbol (♂) and women by the symbol (♀). Increasing similarities are indicated by a warm color. Values equal to 1 are indicated by a blank square.

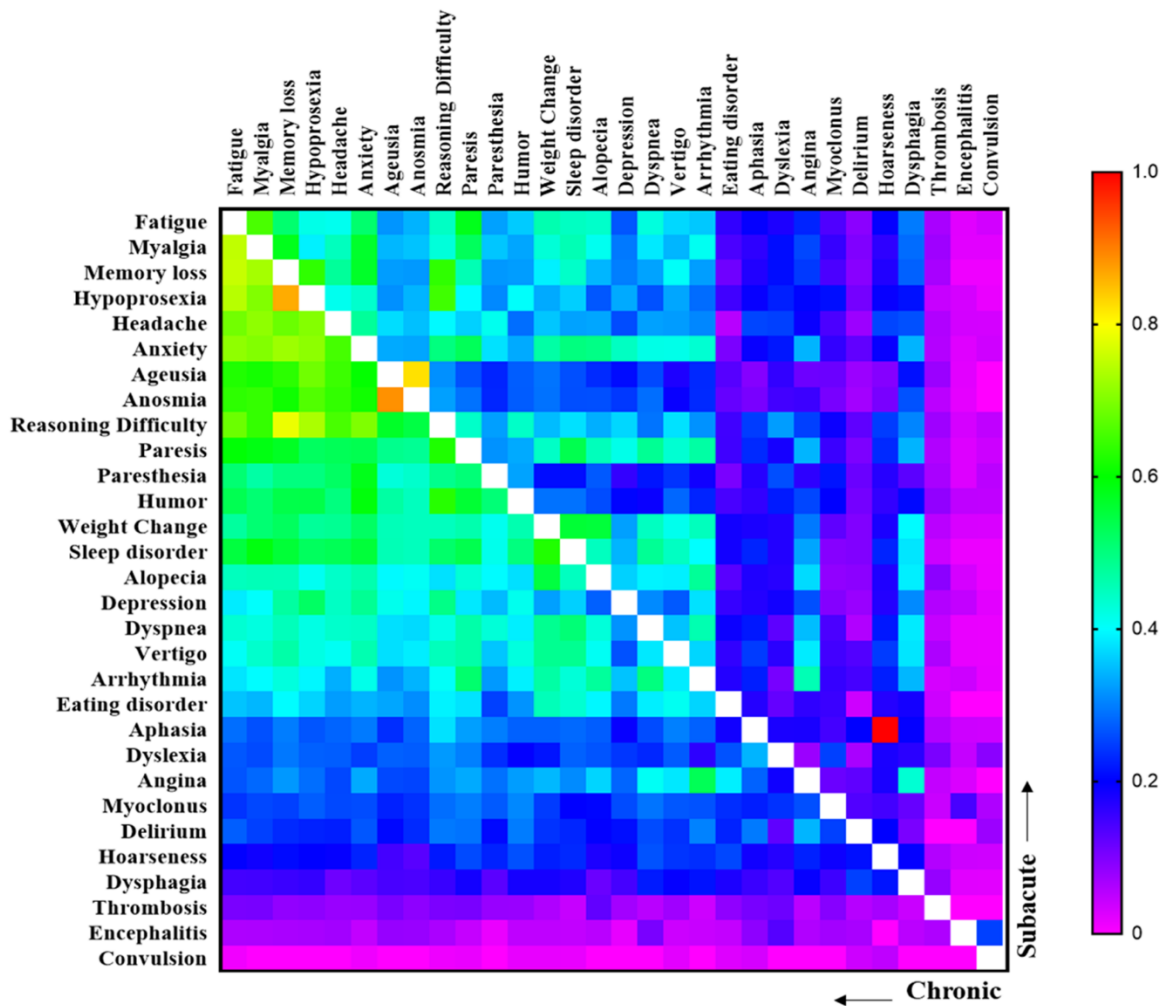

**Fig. S3. Heatmap showing co-occurrence levels (Jaccard similarity index) between pairs of post-COVID-19 condition symptoms in the subacute and chronic phases of PCC.** The Jaccard index was measured based on the presence/absence of symptoms based on the phase of the post-COVID-19 conditions. The co-occurrence of subacute phase symptoms is shown in the upper matrix, while the co-occurrence of chronic phase symptoms is shown in the lower matrix. Increasing similarities are indicated by a warm color. Values equal to 1 are indicated by a blank square.

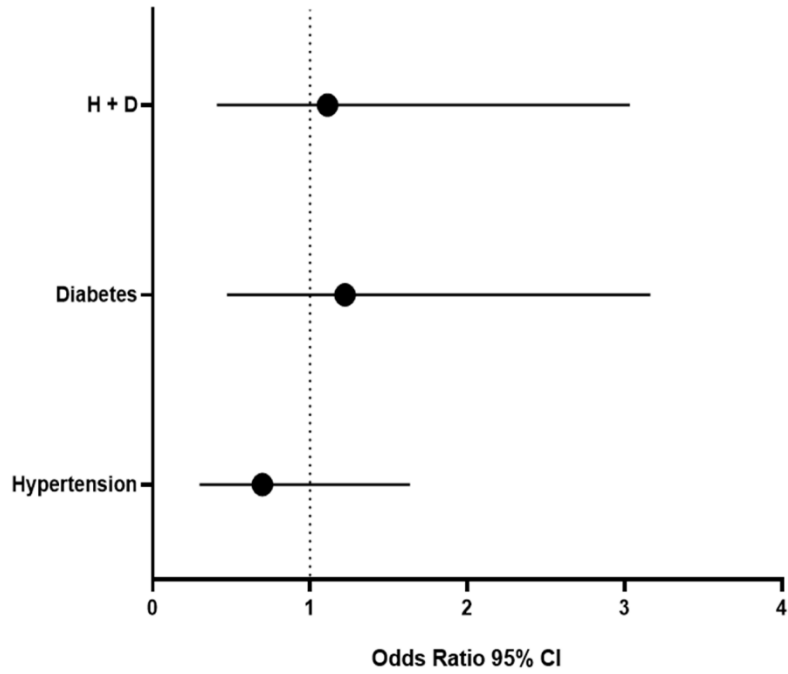

**Fig. S4. Comorbidities diabetes and hypertension as predisposing factors for the development of post-COVID-19 conditions (PCC).** Odds ratio with 95% confidence interval (CI) analysis of comorbidity domains for the development of chronic PCC symptoms. H+D represents patients with diabetes and hypertension comorbidities.
